# Supplementary material for: Parvalbumin- and vasoactive intestinal polypeptide-expressing neocortical interneurons impose differential inhibition on Martinotti cells
Source: PubMed Central journal article supplement (PMC5141346; doi:10.1038/ncomms13664), 2016-11-29
Supplement: ncomms13664-s1.pdf [file ncomms13664-s1.pdf]

**a**

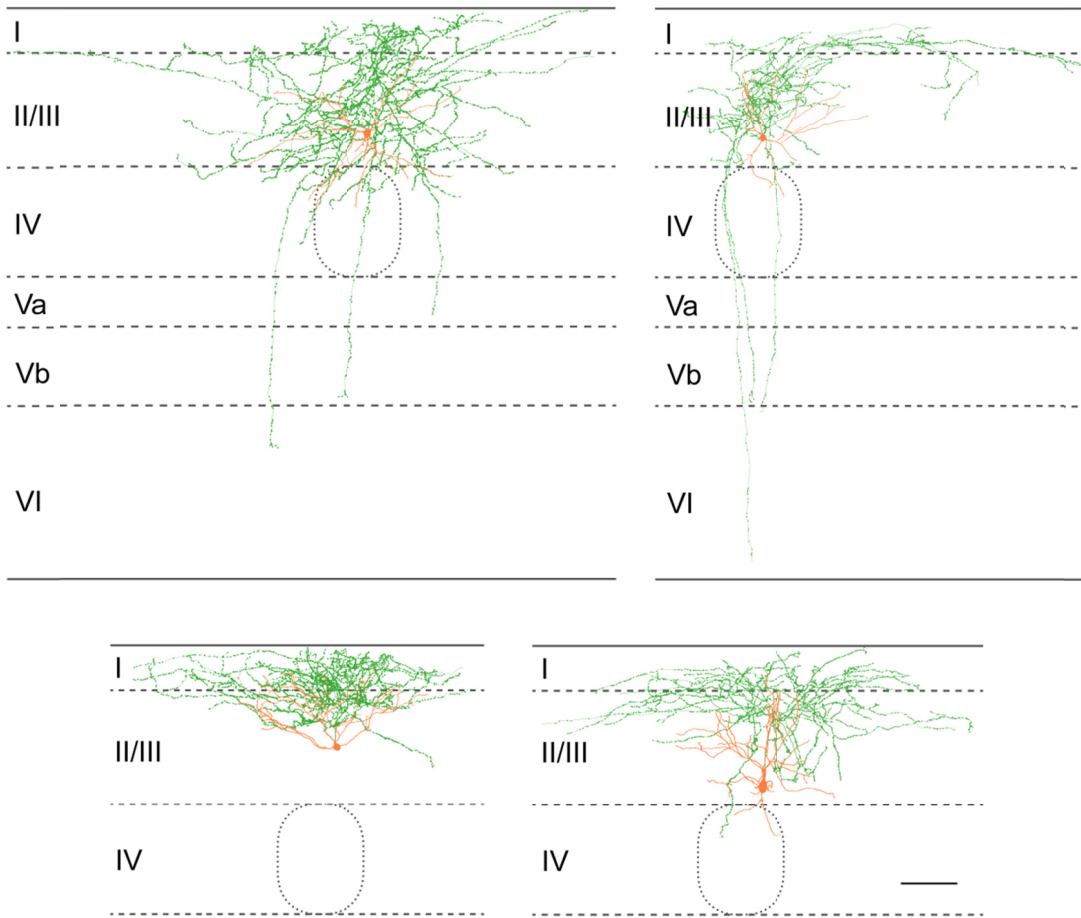

**b**

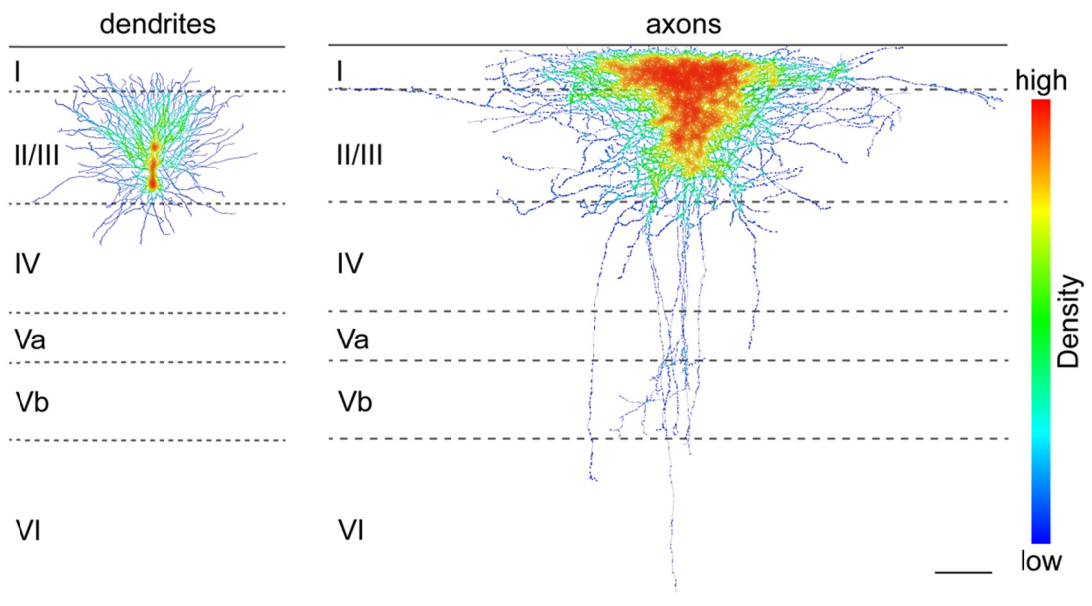

1

2

3 **Supplementary figure 1:** LII/III GIN-cells show morphological characteristics of MC

4 **(a)** Reconstructions of LII/III GIN-cells with somato-dendritic compartments in orange and  
5 axonal arborizations in green. Note the dense axonal branching in L I, which is indicative for  
6 MC. These data were taken from optogenetic experiments. Layers are labeled I-VI. Scale  
7 bar, 100  $\mu\text{m}$

8 **(b)** Vertical alignment of 8 reconstructed GIN-cells taken from **a** and **Supplementary Fig. 2**  
9 with respect to their soma location. The somato-dendritic alignment (left) indicates a  
10 multipolar configuration. Highest densities for axonal branches (right) can be found in LI and  
11 LII/III. Note that this branching pattern is representative for MC. Scale bar, 100  $\mu\text{m}$

12

13

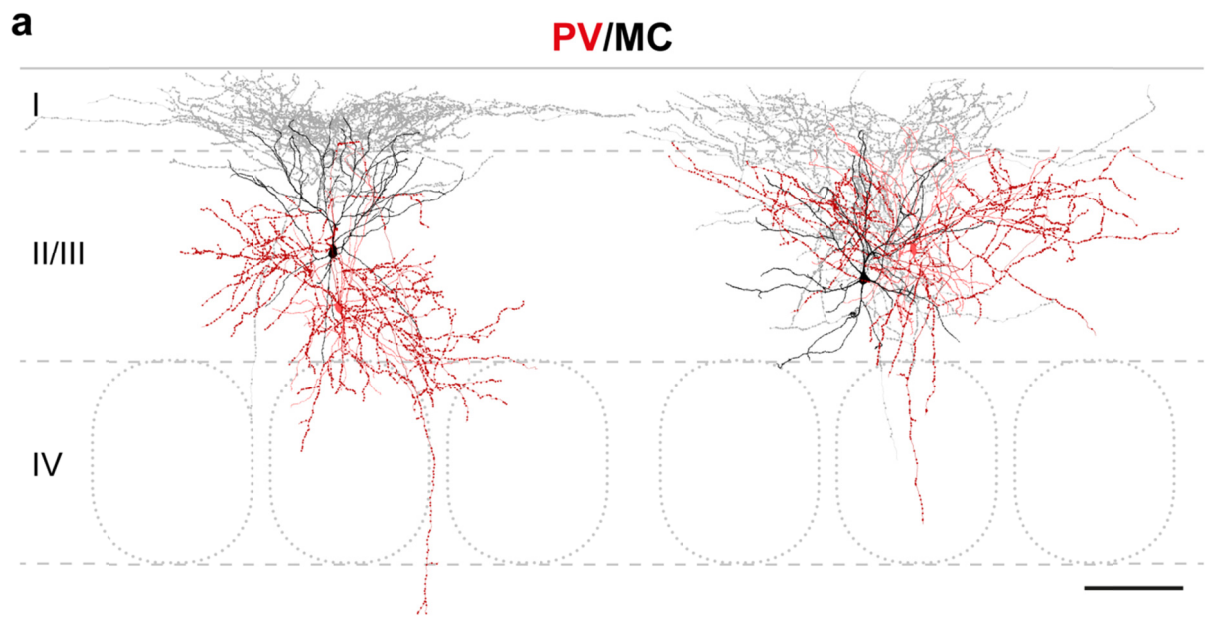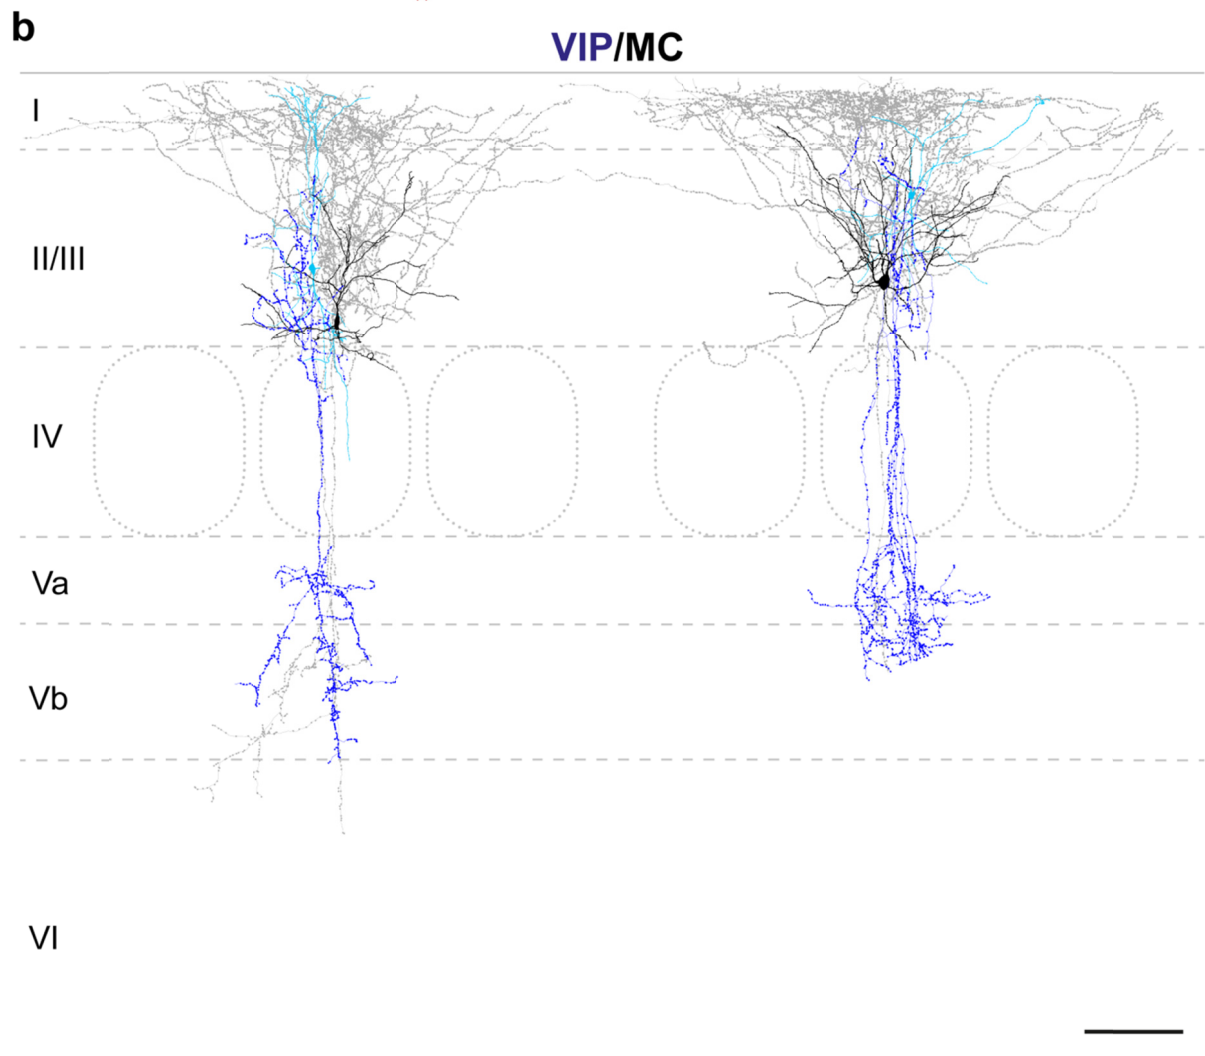

14

15

16

17 **Supplementary figure 2: Morphology of LII/III PV-MC and VIP-MC pairs**

18 **(a)** Reconstructions of two PV-MC pairs. The soma and dendrites of the GIN-cells are  
19 labelled black and the axon in gray. Note the dense axonal arborization in LI. The PV-cells  
20 show a multipolar dendritic configuration (light red) and dense basket-cell like axonal  
21 distribution (red). Cortical layers are labeled I-IV. Scale: 100  $\mu\text{m}$

22 **(b)** Reconstructions of two VIP-MC pairs. GIN-cells are plotted with the same colors as in **a**  
23 (black: soma and dendrites, gray: axon). VIP-cells show a bipolar/bitufted dendritic  
24 configuration (light blue) and vertically descending axon (blue). Scale: 100  $\mu\text{m}$

25

26

27

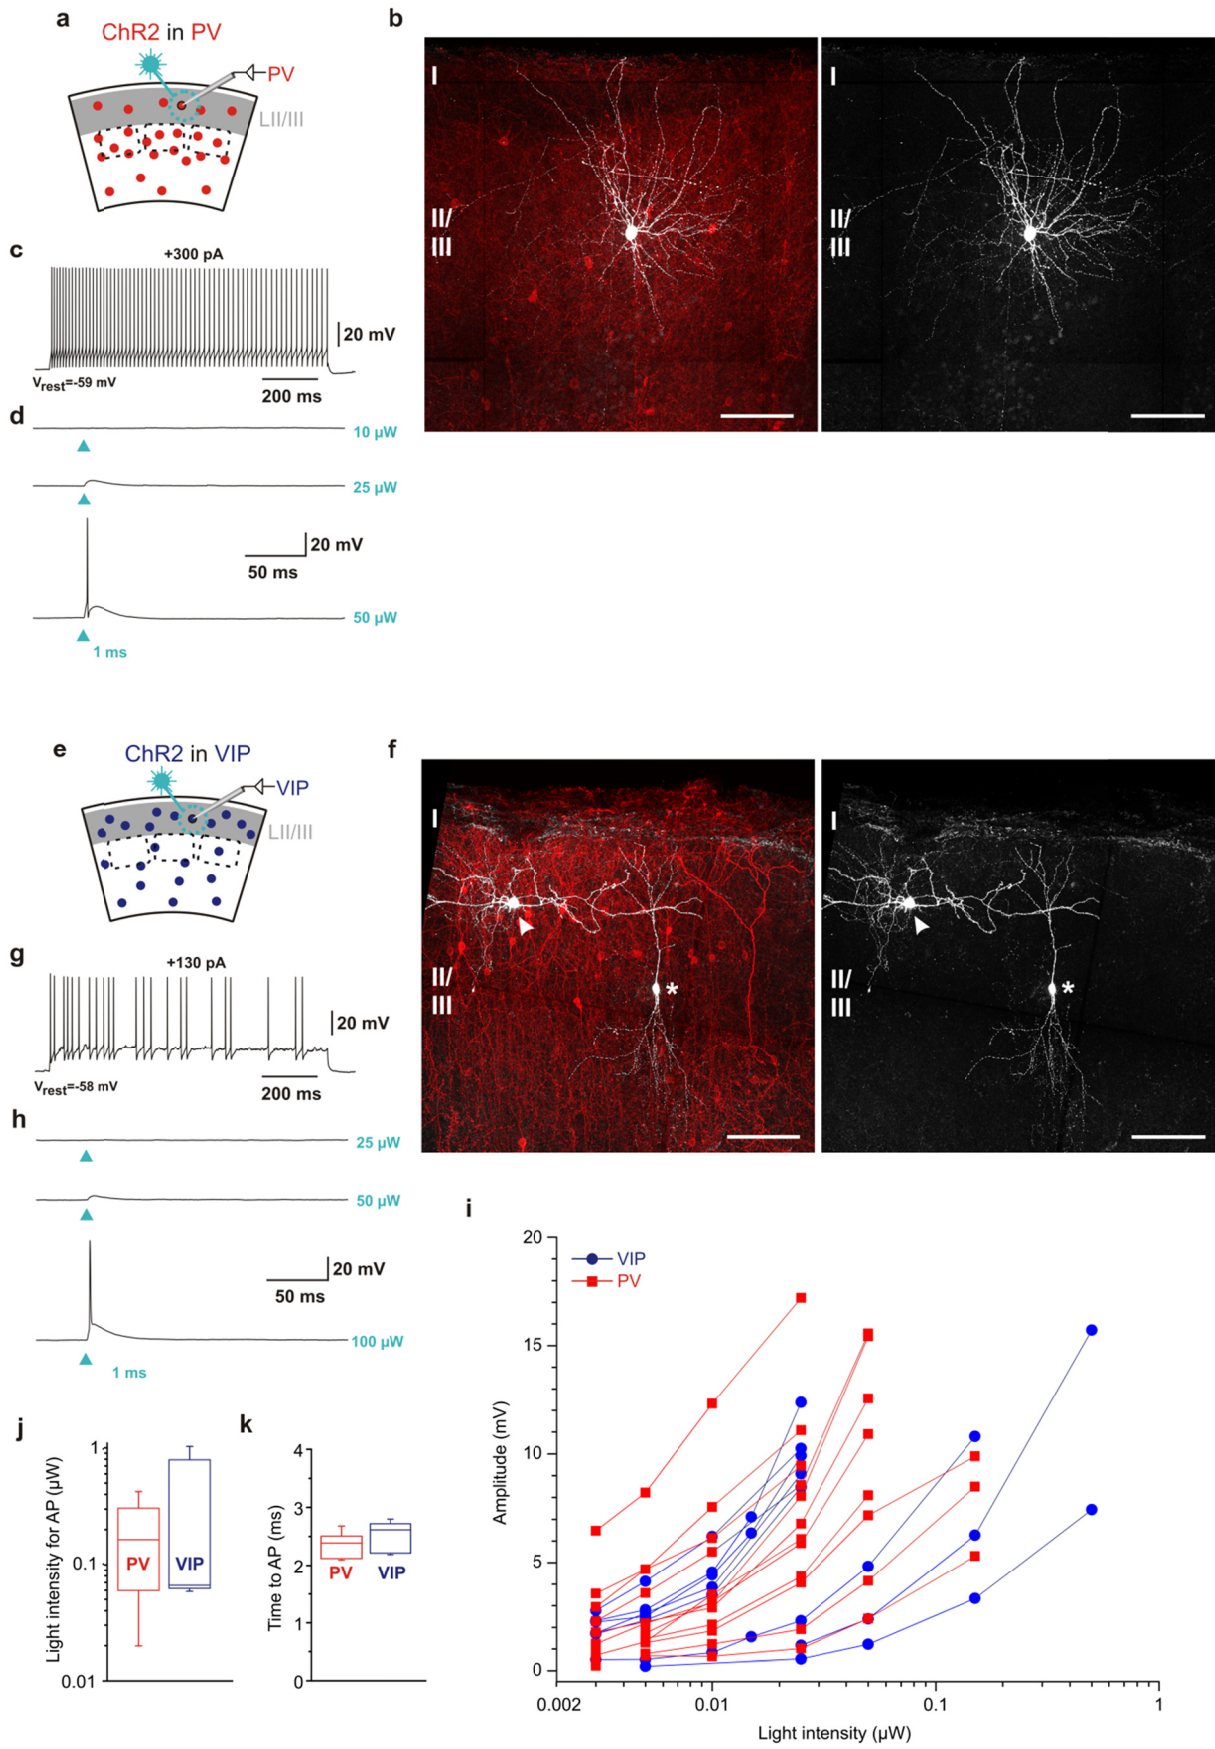

28

29

30 **Supplementary figure 3:** Verification of the optogenetic approach: characterization of cell  
31 types and demonstration of ChR2-evoked activation

32 **(a, e)** Schematic of recording configuration and laser stimulation of transduced PV- **(a)** and  
33 VIP-cells **(e)** in LII/III.

34 **(b, f)** mCherry and biocytin-streptavidin labeling in acute brain slices. ChR2-transduced cells  
35 are labeled in red (mCherry-fluorescence). The biocytin-filled (and mCherry-positive) cells  
36 are shown in white (pseudo-colored). For clarity, recorded cells are shown separately as  
37 gray-scale images (right). The PV-cell labeled by streptavidin exhibits a multipolar dendritic  
38 morphology as described for basket cells **(b)**. The VIP-cell in LII/III (marked by asterisk)  
39 shows a bipolar dendritic configuration and an axon descending toward the white matter **(f)**.  
40 Note that the second labeled neuron (arrowhead) in **(f)** is an MC. This cell was recorded  
41 during subsequent experiments while activating a presynaptic population of VIP-cells. Scale  
42 bars, 100  $\mu\text{m}$

43 **(c, g)** Whole cell recording of mCherry-expressing cells, marked by asterisks in **b** and **f**.  
44 During depolarizing current injections, the PV-cell (age P42) shows a fast spiking firing  
45 pattern **(c)**, whereas the VIP-cell (age P44) shows an irregular firing pattern **(g)**.

46 **(d, h)** Examples of direct photostimulation. Arrowheads indicate photostimulation (473nm  
47 laser, 1ms) of the ChR2-transduced PV- (same as in **b** and **c**) and VIP-cell (same as in **f** and  
48 **(g)**) at three different intensities (subthreshold, threshold, and spike evoking). Laser-  
49 stimulation leads to graded depolarizations, which finally evoke spikes. Note that photo-  
50 induced spiking was triggered in every recorded cell

51 **(i-k)** Quantification of ChR2-activation in transduced PV- and VIP cells (PV: n = 11, age  
52 P38-60; VIP: n = 8, age P35-53). Increased laser intensities lead to larger depolarization in  
53 both interneuron types **(i)**. The threshold of light intensity to induce AP firing is largely  
54 overlapping for PV- and VIP-IN (PV: median: 0.160  $\mu\text{W}$ , 25% quartile: 0.054  $\mu\text{W}$ , 75%  
55 quartile: 0.410  $\mu\text{W}$ ; VIP: median: 0.064  $\mu\text{W}$ , 25% quartile: 0.059  $\mu\text{W}$ , 75% quartile: 0.881

56  $\mu\text{W}$ ) (**j**). Also the time to AP (from stimulus onset to AP peak) for both IN shows comparable  
57 values (PV: median: 2.39 ms, 25% quartile: 2.12 ms, 75% quartile: 2.51 ms; VIP: median:  
58 2.67 ms, 25% quartile: 2.27 ms, 75% quartile: 2.78 ms) (**k**).

59

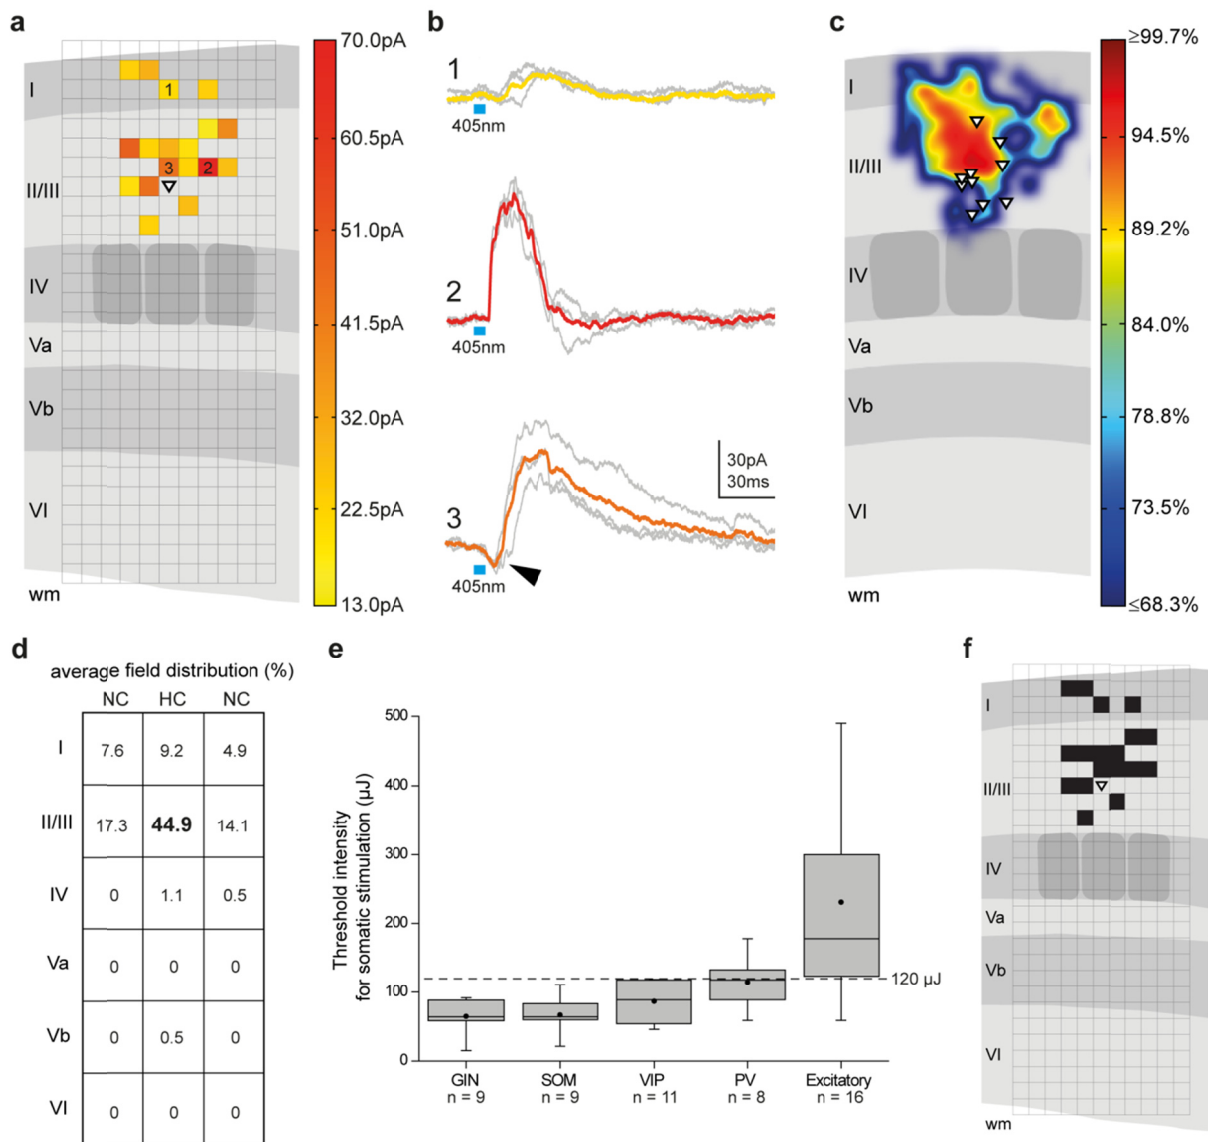

60

61 **Supplementary figure 4:** Glutamate uncaging reveals distribution of monosynaptic inhibitory  
 62 input restricted to LII/III MC

63 **(a)** Example of a glutamate uncaging map of a MC (soma location:  $\nabla$ ) in LII/III of S1.  
 64 Monosynaptic inhibitory responses were evoked in color-coded fields. These fields were  
 65 located only in LI and II/III. The color code depicts the average IPSC amplitude per field.  
 66 IPSC amplitudes seem not to correlate with distance from MC soma. Average responses  
 67 evoked from numbered fields (**1 - 3**) are shown in **b**. Layers are labeled I – VI, wm: white  
 68 matter. Columns are indicated by schematic “barrels” in LIV (**a, c, f**).



69 **(b)** Average (color-coded) and individual (gray) compound IPSCs in response to three  
70 successive laser-stimulations (blue bar: 6 ms, 405 nm) of fields marked in **a**. These  
71 examples show the typical range of amplitudes and waveforms. Note that example 3 consists  
72 of fast direct excitatory input (arrowhead) followed by strong monosynaptic inhibitory input.  
73 As the main focus was on the location of inhibitory inputs and not primarily on their precise  
74 amplitude, no measures to compute the true IPSC amplitude were taken in these cases.

75 **(c)** Average map (n = 10, age P24-34) illustrating the confidence level for the distribution of  
76 monosynaptic inhibitory input. Note that confidence levels  $\geq 90\%$  are predominantly found in  
77 LII/III of the home column and neighboring columns, but also extend to some degree into LI.  
78 Confidence levels ( $\leq 68.3\%$  to  $\geq 99.7\%$ ) are color-coded.

79 **(d)** Table showing the layer- and column-specific distribution of inhibitory fields for the entire  
80 sample (n = 10). We calculated the relative proportion of inhibitory fields for all layers in the  
81 home column (HC) of the recorded MCs as well as the two adjacent neighboring columns  
82 (NC). Note that the highest percentage of inhibitory fields (~45%) is found in L II/III of the  
83 home column.

84 **(e)** Laser-calibration for glutamate uncaging. Box plots show the mean (black dot), the  
85 median, and the interquartile range of laser energy necessary to pass firing threshold for  
86 inhibitory (GIN-, SOM-, VIP-, and PV-cells) and excitatory cortical neurons at somatic  
87 locations. Whisker boundaries are the 10<sup>th</sup> and 90<sup>th</sup> percentile. The dashed line marks the  
88 laser energy used during uncaging experiments (120  $\mu$ J). Note that under these conditions,  
89 ~86% of INs, but only ~25% of excitatory neurons were driven to threshold.

90 **(f)** Example of a binary glutamate uncaging map. In binary maps, fields containing  
91 presynaptic INs are colored black regardless of the amplitude of the corresponding IPSC.  
92 The binary map here corresponds to the amplitude-coded example shown in figure 1a.  
93 These maps (n = 10) were used to calculate the distribution of inhibitory fields with respect to

94 layers and columns, and the average confidence level map shown in figure 1c. Layers are  
95 labeled I-VI, wm: white matter.

96

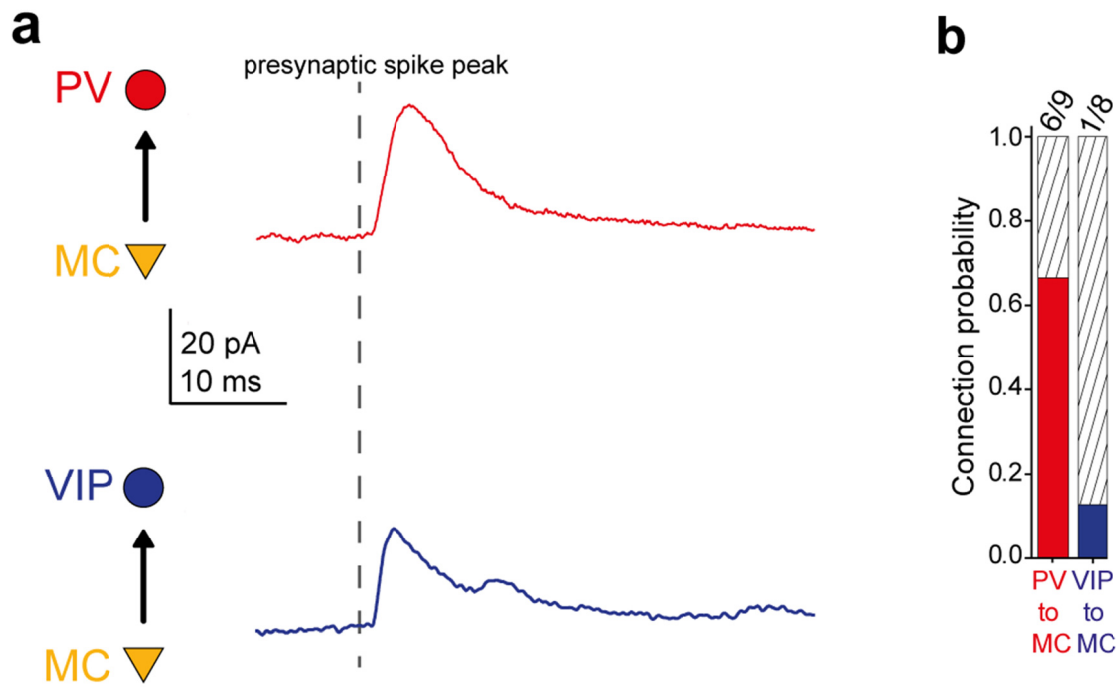

97

98 **Supplementary figure 5:** Reciprocal connections of PV-MC and VIP-MC pairs

99 **(a)** Average of unitary IPSC in one PV-cell (red; 10 traces, age P23) and in one VIP-cell  
 100 (blue, 9 traces, age P25) evoked by repeatedly stimulating spikes in MC. IPSCs were aligned  
 101 with respect to the presynaptic spike peak (dashed line) prior to averaging.

102 **(b)** PV-MC pairs are more likely to be reciprocally connected (~67%) than VIP-MC pairs  
 103 (~12.5%).

104

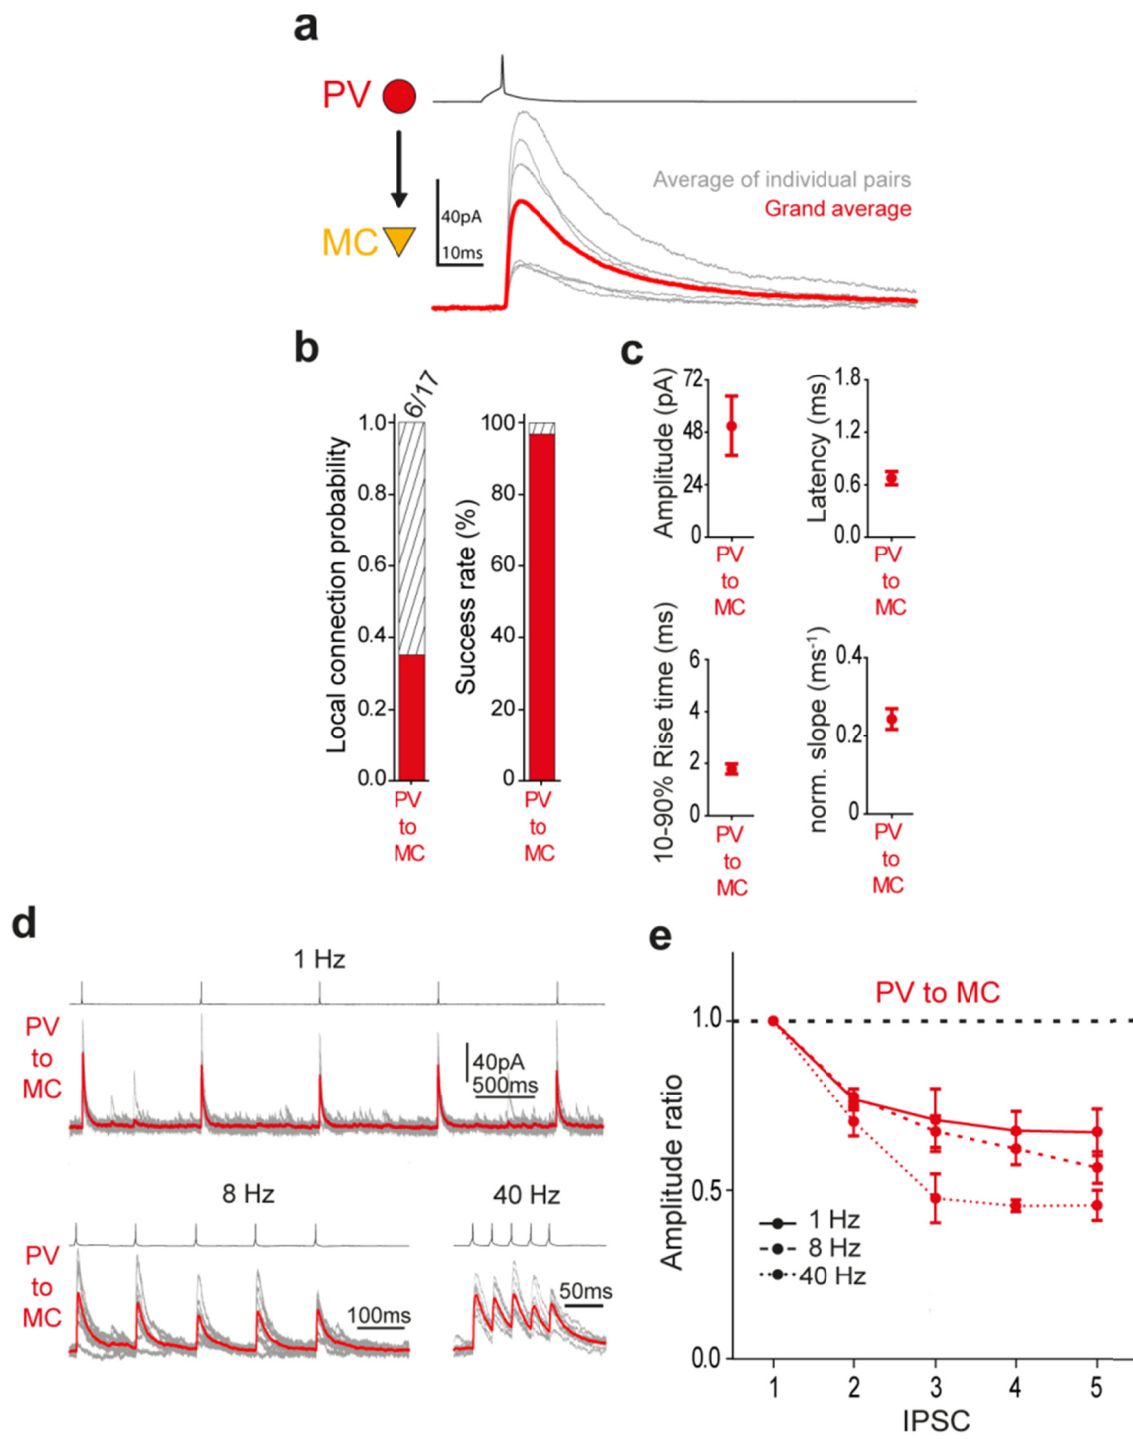

110 **Supplementary figure 6:** Elementary synaptic properties and short-term plasticity of unitary  
111 connections of PV-cells and MC in primary visual cortex (V1)

112 **(a)** Grand average (red) of unitary IPSCs in MC in response to a single spike, repeatedly  
113 evoked in presynaptic PV-cells (n = 6, age P27-49). Averages of individual pairs are shown  
114 in gray.

115 **(b)** Connection probability (left) and success rate of synaptic transmission (right) of the  
116 recorded unitary connections. The connection probability of PV-cells with local MC was  
117 ~41%. In connected pairs, synaptic transmission was highly reliable.

118 **(c)** Quantification of unitary IPSCs. Amplitude, latency, 10-90% rise time, and normalized  
119 slope as fraction of amplitude per ms were analyzed based on averages of each individual  
120 connected pair. Afterwards, mean  $\pm$  s.e.m was calculated.

121 **(d)** Individual examples of averaged IPSCs in MCs in response to trains of five spikes (1, 8  
122 and 40 Hz) evoked in a presynaptic PV-cell. Individual traces are shown in gray.  
123 Quantification is shown in **e**.

124 **(e)** Quantitative analysis of short-term plasticity at different frequencies (1 Hz: n = 6; 8 Hz:  
125 n = 6; 40 Hz: n = 5). Amplitude-ratio ( $n^{\text{th}}$  response/ $1^{\text{st}}$  response) of consecutive IPSCs plotted  
126 versus successive IPSCs. At the population level, PV to MC responses show synaptic  
127 depression at all stimulus conditions. Values represent mean  $\pm$  s.e.m.

**a**

Age Amplitude Latency Rise time Slope Success rate

|    | Age | Amplitude | Latency | Rise time | Slope | Success rate |
|----|-----|-----------|---------|-----------|-------|--------------|
| 1  | 31  | 114.90    | 0.43    | 0.89      | 0.45  | 100          |
| 2  | 36  | 1133      | 102     | 2.21      | 0.18  | 90           |
| 3  | 32  | 2132      | 0.47    | 169       | 0.26  | 100          |
| 4  | 33  | 26.44     | 0.64    | 2.96      | 0.13  | 90           |
| 5  | 34  | 15143     | 0.52    | 134       | 0.27  | 100          |
| 6  | 42  | 82.98     | 0.44    | 141       | 0.20  | 100          |
| 7  | 23  | 60.90     | 0.36    | 132       | 0.37  | 100          |
| 8  | 26  | 40.87     | 0.60    | 127       | 0.33  | 100          |
| 9  | 31  | 22.88     | 0.48    | 0.82      | 0.73  | 79           |
| 10 | 32  | 16.59     | 0.51    | 190       | 0.16  | 75           |
| 11 | 21  | 1153      | 107     | 2.11      | 0.11  | 60           |
| 12 | 28  | 35.68     | 0.63    | 150       | 0.40  | 100          |

Individual pair

PV to MC

S1

Age Amplitude Latency Rise time Slope Success rate

|    | Age | Amplitude | Latency | Rise time | Slope | Success rate |
|----|-----|-----------|---------|-----------|-------|--------------|
| 1  | 21  | 5.41      | 175     | 9.08      | 0.05  | 100          |
| 2  | 21  | 7.57      | 2.10    | 7.57      | 0.08  | 100          |
| 3  | 24  | 6.36      | 145     | 5.27      | 0.06  | 80           |
| 4  | 26  | 9.91      | 1.10    | 4.10      | 0.07  | 89           |
| 5  | 32  | 7.75      | 154     | 3.28      | 0.12  | 70           |
| 6  | 27  | 5.24      | 0.66    | 5.71      | 0.06  | 60           |
| 7  | 25  | 46.37     | 1.16    | 2.37      | 0.25  | 100          |
| 8  | 27  | 7.16      | 140     | 3.09      | 0.10  | 83           |
| 9  | 27  | 17.19     | 126     | 2.58      | 0.29  | 74           |
| 10 | 24  | 10.49     | 168     | 3.35      | 0.13  | 67           |
| 11 | 24  | 10.01     | 1.15    | 4.14      | 0.14  | 67           |

Individual pair

VIP to MC

**b**

Age Amplitude Latency Rise time Slope Success rate

|   | Age | Amplitude | Latency | Rise time | Slope | Success rate |
|---|-----|-----------|---------|-----------|-------|--------------|
| 1 | 41  | 92.72     | 0.60    | 162       | 0.20  | 100          |
| 2 | 40  | 68.03     | 0.69    | 144       | 0.22  | 100          |
| 3 | 49  | 22.45     | 0.36    | 164       | 0.30  | 100          |
| 4 | 49  | 80.63     | 0.68    | 159       | 0.32  | 100          |
| 5 | 27  | 19.39     | 0.86    | 160       | 0.28  | 80           |
| 6 | 27  | 20.89     | 0.87    | 2.75      | 0.13  | 100          |

Individual pair

PV to MC

V1

128

129 **Supplementary table 1:** Quantification of unitary IPSC evoked in MC for each individual pair  
 130 in S1 and V1.

131 **(a, b)** Table containing the age (postnatal day) of the mice and the corresponding averages  
 132 of amplitude (pA), latency (ms), 10-90% rise time (ms), normalized slope (fraction of  
 133 amplitude per ms) and success rate (%) from 10-20 trials per pair for **(a)** PV to MC  
 134 connections (top row, 12 pairs) and VIP to MC connections (bottom row, 11 pairs) in S1 and  
 135 **(b)** PV to MC connections (6 pairs) in V1.

**a**

|                 |                 | 1 Hz                                    |                 |                 |                 |                 | 8 Hz                                    |                 |                 |                 |                 | 40 Hz                                   |                 |                 |                 |                 |
|-----------------|-----------------|-----------------------------------------|-----------------|-----------------|-----------------|-----------------|-----------------------------------------|-----------------|-----------------|-----------------|-----------------|-----------------------------------------|-----------------|-----------------|-----------------|-----------------|
|                 |                 | Avg. amplitude of subsequent IPSCs (pA) |                 |                 |                 |                 | Avg. amplitude of subsequent IPSCs (pA) |                 |                 |                 |                 | Avg. amplitude of subsequent IPSCs (pA) |                 |                 |                 |                 |
|                 |                 | 1 <sup>st</sup>                         | 2 <sup>nd</sup> | 3 <sup>rd</sup> | 4 <sup>th</sup> | 5 <sup>th</sup> | 1 <sup>st</sup>                         | 2 <sup>nd</sup> | 3 <sup>rd</sup> | 4 <sup>th</sup> | 5 <sup>th</sup> | 1 <sup>st</sup>                         | 2 <sup>nd</sup> | 3 <sup>rd</sup> | 4 <sup>th</sup> | 5 <sup>th</sup> |
| <b>PV to MC</b> | Individual pair |                                         |                 |                 |                 |                 |                                         |                 |                 |                 |                 |                                         |                 |                 |                 |                 |
|                 | 1               | 104.46                                  | 78.83           | 80.37           | 92.49           | 81.40           |                                         |                 |                 |                 |                 |                                         |                 |                 |                 |                 |
|                 | 2               | 14.74                                   | 11.96           | 13.87           | 10.76           | 14.65           | 16.03                                   | 10.57           | 11.85           | 9.51            | 10.36           | 14.15                                   | 9.92            | 9.55            | 7.85            | 7.99            |
|                 | 3               | 17.58                                   | 15.80           | 15.07           | 15.01           | 17.60           | 18.74                                   | 13.53           | 8.77            | 11.41           | 6.00            | 21.43                                   | 12.42           | 14.90           | 5.50            | 9.07            |
|                 | 4               | 128.77                                  | 106.93          | 100.68          | 96.01           | 95.17           | 128.27                                  | 83.72           | 65.41           | 57.29           | 47.95           | 131.82                                  | 64.83           | 40.89           | 44.77           | 33.22           |
|                 | 5               | 98.03                                   | 65.41           | 69.42           | 66.57           | 74.50           | 92.65                                   | 69.25           | 51.60           | 42.79           | 40.06           | 93.48                                   | 56.79           | 42.82           | 40.02           | 34.64           |
|                 | 6               | 9.70                                    | 5.46            | 6.80            | 6.69            | 8.28            | 7.75                                    | 8.41            | 5.58            | 5.50            | 4.92            | 8.28                                    | 5.82            | 5.79            | 3.87            | 3.70            |
|                 | 7               | 56.70                                   | 44.43           | 40.06           | 45.92           | 45.01           | 56.44                                   | 32.82           | 29.33           | 25.62           | 19.52           | 52.22                                   | 29.62           | 24.78           | 20.16           | 22.42           |
|                 | 8               | 53.48                                   | 41.29           | 30.32           | 47.37           | 37.92           | 52.40                                   | 30.39           | 27.16           | 28.89           | 24.40           | 48.10                                   | 33.48           | 24.06           | 24.04           | 17.97           |
|                 | 9               | 9.59                                    | 7.82            | 11.55           | 5.95            | 7.61            | 16.29                                   | 9.79            | 6.10            | 5.97            | 9.89            | 10.18                                   | 6.64            | 5.05            | 4.85            | 5.34            |
|                 | 10              | 10.55                                   | 11.51           | 9.79            | 9.68            | 6.89            | 13.86                                   | 5.96            | 7.59            | 9.33            | 2.86            | 12.29                                   | 4.20            | 5.50            | 4.03            | 4.90            |
| 11              | 37.63           | 33.87                                   | 33.83           | 31.78           | 27.35           | 43.34           | 26.10                                   | 17.13           | 17.67           | 16.56           | 45.46           | 17.48                                   | 16.59           | 12.13           | 11.18           |                 |

  

|                  |                 | 1 Hz                                    |                 |                 |                 |                 | 8 Hz                                    |                 |                 |                 |                 | 40 Hz                                   |                 |                 |                 |                 |
|------------------|-----------------|-----------------------------------------|-----------------|-----------------|-----------------|-----------------|-----------------------------------------|-----------------|-----------------|-----------------|-----------------|-----------------------------------------|-----------------|-----------------|-----------------|-----------------|
|                  |                 | Avg. amplitude of subsequent IPSCs (pA) |                 |                 |                 |                 | Avg. amplitude of subsequent IPSCs (pA) |                 |                 |                 |                 | Avg. amplitude of subsequent IPSCs (pA) |                 |                 |                 |                 |
|                  |                 | 1 <sup>st</sup>                         | 2 <sup>nd</sup> | 3 <sup>rd</sup> | 4 <sup>th</sup> | 5 <sup>th</sup> | 1 <sup>st</sup>                         | 2 <sup>nd</sup> | 3 <sup>rd</sup> | 4 <sup>th</sup> | 5 <sup>th</sup> | 1 <sup>st</sup>                         | 2 <sup>nd</sup> | 3 <sup>rd</sup> | 4 <sup>th</sup> | 5 <sup>th</sup> |
| <b>VIP to MC</b> | Individual pair |                                         |                 |                 |                 |                 |                                         |                 |                 |                 |                 |                                         |                 |                 |                 |                 |
|                  | 1               | 3.78                                    | 3.02            | 3.34            | 6.28            | 2.59            | 2.43                                    | 3.35            | 3.19            | 3.23            | 2.72            |                                         |                 |                 |                 |                 |
|                  | 2               | 6.32                                    | 5.31            | 6.50            | 3.59            | 3.48            | 5.63                                    | 4.35            | 2.69            | 4.27            | 2.87            | 5.64                                    | 4.72            | 6.87            | 6.79            | 10.16           |
|                  | 3               | 3.63                                    | 2.85            | 2.98            | 3.64            | 3.83            | 2.60                                    | 2.84            | 4.16            | 4.28            | 2.49            | 3.73                                    | 5.10            | 3.46            | 4.45            | 4.99            |
|                  | 4               | 7.58                                    | 9.87            | 8.29            | 7.17            | 7.86            | 5.23                                    | 7.02            | 7.76            | 6.89            | 6.25            | 4.43                                    | 6.04            | 5.98            | 6.76            | 8.38            |
|                  | 5               | 9.46                                    | 7.97            | 8.76            | 8.61            | 10.34           | 12.32                                   | 12.44           | 11.27           | 10.45           | 10.02           | 11.16                                   | 10.20           | 14.96           | 12.22           | 11.39           |
|                  | 6               | 3.86                                    | 6.04            | 6.44            | 9.60            | 9.73            | 6.49                                    | 4.57            | 5.34            | 8.24            | 5.35            | 4.19                                    | 9.06            | 10.44           | 9.14            | 14.35           |
|                  | 7               | 43.62                                   | 44.03           | 37.49           | 45.98           | 50.43           | 39.20                                   | 43.20           | 40.25           | 54.45           | 50.63           | 37.08                                   | 52.46           | 68.34           | 66.30           | 64.94           |
|                  | 8               | 2.68                                    | 4.11            | 2.81            | 2.84            | 4.31            | 4.05                                    | 2.92            | 2.85            | 4.66            | 2.77            | 3.83                                    | 2.93            | 7.06            | 5.43            | 6.03            |
|                  | 9               | 13.19                                   | 13.73           | 11.25           | 12.41           | 11.24           | 5.28                                    | 10.45           | 6.61            | 11.34           | 5.53            | 11.68                                   | 12.53           | 16.82           | 14.94           | 14.00           |
|                  | 10              | 4.70                                    | 4.31            | 6.19            | 5.28            | 4.58            | 4.67                                    | 3.03            | 3.74            | 3.83            | 4.55            | 6.41                                    | 7.84            | 11.14           | 16.89           | 18.20           |
| 11               | 8.03            | 6.08                                    | 6.35            | 4.39            | 6.09            | 4.40            | 4.51                                    | 5.15            | 4.34            | 4.81            | 5.51            | 5.01                                    | 5.24            | 7.75            | 7.02            |                 |

**b**

|                 |                 | 1 Hz                                    |                 |                 |                 |                 | 8 Hz                                    |                 |                 |                 |                 | 40 Hz                                   |                 |                 |                 |                 |
|-----------------|-----------------|-----------------------------------------|-----------------|-----------------|-----------------|-----------------|-----------------------------------------|-----------------|-----------------|-----------------|-----------------|-----------------------------------------|-----------------|-----------------|-----------------|-----------------|
|                 |                 | Avg. amplitude of subsequent IPSCs (pA) |                 |                 |                 |                 | Avg. amplitude of subsequent IPSCs (pA) |                 |                 |                 |                 | Avg. amplitude of subsequent IPSCs (pA) |                 |                 |                 |                 |
|                 |                 | 1 <sup>st</sup>                         | 2 <sup>nd</sup> | 3 <sup>rd</sup> | 4 <sup>th</sup> | 5 <sup>th</sup> | 1 <sup>st</sup>                         | 2 <sup>nd</sup> | 3 <sup>rd</sup> | 4 <sup>th</sup> | 5 <sup>th</sup> | 1 <sup>st</sup>                         | 2 <sup>nd</sup> | 3 <sup>rd</sup> | 4 <sup>th</sup> | 5 <sup>th</sup> |
| <b>PV to MC</b> | Individual pair |                                         |                 |                 |                 |                 |                                         |                 |                 |                 |                 |                                         |                 |                 |                 |                 |
|                 | 1               | 78.07                                   | 64.59           | 54.75           | 66.57           | 58.48           | 59.63                                   | 46.63           | 34.30           | 40.10           | 41.34           | 54.84                                   | 35.97           | 38.59           | 28.30           | 31.14           |
|                 | 2               | 93.69                                   | 72.72           | 63.99           | 73.03           | 66.27           | 87.58                                   | 67.99           | 69.42           | 47.20           | 45.61           | 70.02                                   | 65.94           | 51.83           | 51.66           | 49.60           |
|                 | 3               | 27.02                                   | 17.45           | 23.22           | 18.14           | 21.41           | 20.51                                   | 14.19           | 14.98           | 10.75           | 11.11           | 26.48                                   | 14.89           | 9.89            | 11.47           | 9.31            |
|                 | 4               | 86.17                                   | 66.86           | 64.02           | 57.15           | 69.67           | 81.53                                   | 71.46           | 64.68           | 67.67           | 54.56           |                                         |                 |                 |                 |                 |
|                 | 5               | 18.42                                   | 13.11           | 17.64           | 11.66           | 11.03           | 16.76                                   | 12.19           | 8.89            | 9.49            | 9.89            | 17.06                                   | 12.26           | 8.86            | 7.46            | 9.10            |
| 6               | 23.47           | 20.31                                   | 6.83            | 10.36           | 8.44            | 26.04           | 20.67                                   | 15.89           | 15.36           | 9.80            | 11.65           | 12.35                                   | 8.36            | 6.62            | 8.78            |                 |

136

137 **Supplementary table 2: Unitary IPSC amplitudes evoked in MC by presynaptic spike trains**  
 138 in PV- or VIP-cells.

139 **(a, b)** Summary of average amplitudes of the five subsequent IPSCs (1<sup>st</sup> to 5<sup>th</sup>) induced  
 140 during train stimulations for all individual PV to MC connections (top row, 11 pairs) and VIP to  
 141 MC connections (bottom row, 11 pairs) in S1 **(a)** and PV to MC connections (6 pairs) in V1  
 142 **(b)** and for the different stimulus frequencies (1, 8, and 40 Hz). Empty rows are due to  
 143 incomplete recordings.

**a**

|    |           | 1 Hz |        |        |        |        | 8 Hz   |   |        |        |        | 40 Hz  |        |   |        |        |        |        |        |
|----|-----------|------|--------|--------|--------|--------|--------|---|--------|--------|--------|--------|--------|---|--------|--------|--------|--------|--------|
|    |           | IPSC |        |        |        |        | IPSC   |   |        |        |        | IPSC   |        |   |        |        |        |        |        |
|    |           | 1    | 2      | 3      | 4      | 5      | 1      | 2 | 3      | 4      | 5      | 1      | 2      | 3 | 4      | 5      |        |        |        |
| S1 | PV to MC  | 1    |        | <0.001 | <0.001 | <0.001 | <0.001 | 1 |        | <0.001 | <0.001 | <0.001 | <0.001 | 1 |        | <0.001 | <0.001 | <0.001 |        |
|    |           | 2    | <0.001 |        | 0.809  | 0.690  | 0.886  | 2 | <0.001 |        | 0.031  | 0.048  | 0.006  | 2 | <0.001 |        | 0.323  | 0.004  | 0.004  |
|    |           | 3    | <0.001 | 0.809  |        | 0.546  | 0.702  | 3 | <0.001 | 0.031  |        | 0.886  | 0.135  | 3 | <0.001 | 0.323  |        | 0.052  | 0.058  |
|    |           | 4    | <0.001 | 0.690  | 0.546  |        | 0.778  | 4 | <0.001 | 0.048  | 0.886  |        | 0.165  | 4 | <0.001 | 0.004  | 0.052  |        | 0.954  |
|    |           | 5    | <0.001 | 0.886  | 0.702  | 0.778  |        | 5 | <0.001 | 0.006  | 0.135  | 0.165  |        | 5 | <0.001 | 0.004  | 0.058  | 0.954  |        |
| S1 | VIP to MC | 1    |        |        |        |        | 1      |   |        |        |        | 1      |        |   |        |        |        |        |        |
|    |           | 2    |        | 0.262  | 0.726  | 0.726  | 0.726  | 2 |        | 0.262  | 0.726  | 0.262  | 0.726  | 2 |        | 0.443  | 0.017  | <0.001 | <0.001 |
|    |           | 3    | 0.262  |        | 0.793  | 0.470  | 0.743  | 3 | 0.262  |        | 0.848  | 0.264  | 0.373  | 3 | 0.433  |        | 0.124  | 0.064  | 0.029  |
|    |           | 4    | 0.726  | 0.793  |        | 0.555  | 0.743  | 4 | 0.726  | 0.848  |        | 0.200  | 0.702  | 4 | 0.017  | 0.124  |        | 0.910  | 0.272  |
|    |           | 5    | 0.726  | 0.470  | 0.555  |        | 0.844  | 5 | 0.262  | 0.264  | 0.200  |        | 0.057  | 5 | <0.001 | 0.064  | 0.910  |        | 0.372  |
| V1 | PV to MC  | 1    |        |        |        |        | 1      |   |        |        |        | 1      |        |   |        |        |        |        |        |
|    |           | 2    |        | 0.026  | 0.026  | 0.026  | <0.001 | 2 |        | <0.001 | <0.001 | <0.001 | <0.001 | 2 |        | <0.001 | <0.001 | <0.001 |        |
|    |           | 3    | 0.026  |        | 0.520  | 0.383  | 0.159  | 3 | <0.001 |        | 0.029  | 0.013  | 0.001  | 3 | <0.001 |        | 0.027  | <0.001 | 0.004  |
|    |           | 4    | 0.026  | 0.520  |        | 0.987  | 0.575  | 4 | <0.001 | 0.029  |        | 0.600  | 0.057  | 4 | <0.001 | 0.027  |        | 0.770  | 0.813  |
|    |           | 5    | 0.026  | 0.383  | 0.987  |        | 0.594  | 5 | <0.001 | 0.013  | 0.600  |        | 0.136  | 5 | <0.001 | <0.001 | 0.770  |        | 0.841  |
| V1 | VIP to MC | 1    |        |        |        |        | 1      |   |        |        |        | 1      |        |   |        |        |        |        |        |
|    |           | 2    |        |        |        |        |        | 2 |        |        |        |        |        | 2 |        |        |        |        |        |
|    |           | 3    |        |        |        |        |        | 3 |        |        |        |        |        | 3 |        |        |        |        |        |
|    |           | 4    |        |        |        |        |        | 4 |        |        |        |        |        | 4 |        |        |        |        |        |
|    |           | 5    |        |        |        |        |        | 5 |        |        |        |        |        | 5 |        |        |        |        |        |

144

145 **Supplementary table 3: P-values of statistical analysis of unitary IPSC amplitudes evoked**  
 146 **in MC by presynaptic spike trains in PV- or VIP-cells.**

147 **(a, b)** Tables containing p-values of the statistical analysis of normalized IPSC amplitudes for  
 148 both PV to MC (top row) and VIP to MC connections (bottom row) in S1 **(a)** and for the PV to  
 149 MC connection in V1 **(b)** and for the different stimulus frequencies (S1: 1 Hz: PV to MC: n =  
 150 11, VIP to MC: n = 11; 8 Hz: PV to MC: n = 10, VIP to MC: n = 11; 40 Hz: PV to MC: n = 10,  
 151 VIP to MC: n = 11; V1: 1 Hz: PV to MC: n = 6; 8 Hz: PV to MC: n = 5; 40 Hz PV to MC: n =  
 152 5). Amplitude ratios ( $n^{\text{th}}$ -response/ $1^{\text{st}}$ -response) were calculated and tested for statistical  
 153 differences. Significant differences ( $P < 0.05$ ) are indicated by gray shading. Under all  
 154 stimulus conditions, short-term plasticity was observed for the PV to MC connection. In  
 155 response to 1 Hz stimulation there is a significant difference between the  $1^{\text{st}}$  and the four  
 156 subsequent IPSCs, the latter ones remaining at a similarly depressed amplitude level. Higher  
 157 frequencies (8 and 40 Hz) induce further decrease in amplitude. Synaptic plasticity was  
 158 absent at 1 Hz and 8 Hz stimulations for the VIP to MC connection. At 40 Hz stimulation, a  
 159 significant facilitation of the IPSC amplitude was observed for the last three responses with  
 160 respect to the  $1^{\text{st}}$  IPSC.
